# Supplementary material
Source: Springer Nature journal article supplement (https://www.springermedizin.de/resource/supplementary/12876_2009_355_MOESM3_ESM.pdf/9439232)

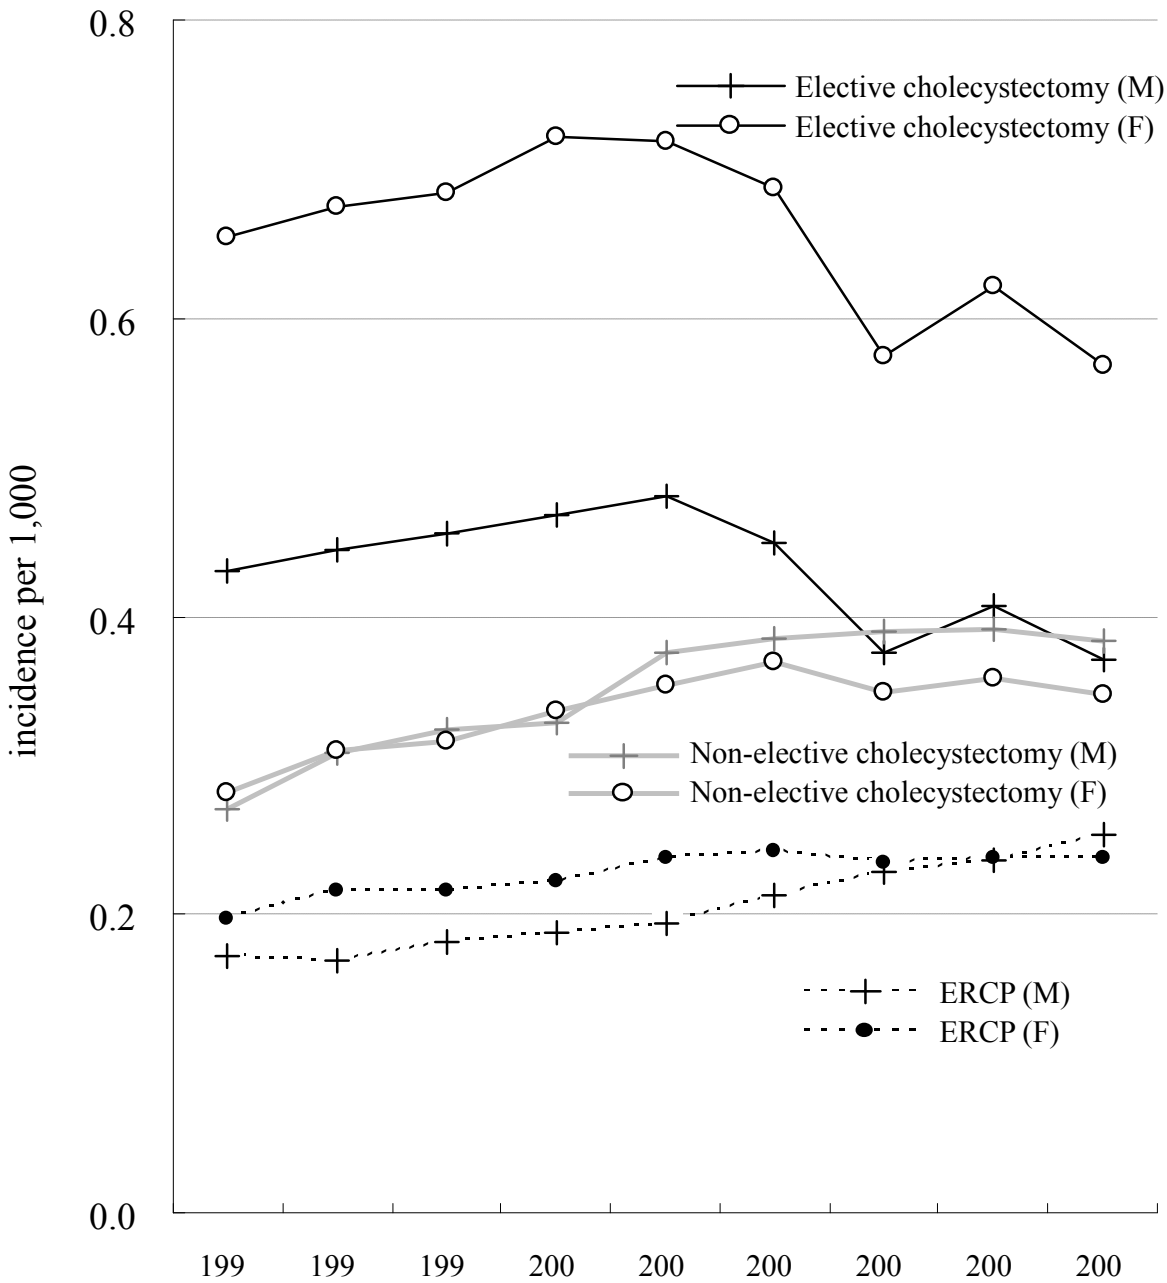

Supplement: MOESM3 [file 9439232]
